# Supplementary material
Source: publisher figshare collection journal article supplement (https://plos.figshare.com/articles/dataset/_/4503584)
Supplement: Supplementary file 1 [file 1 › S1 Table.pdf]

---

Stance Occupied

Facing Each Other?

Yes

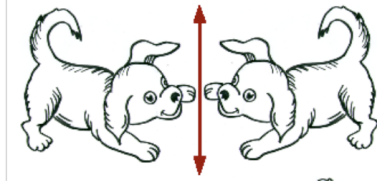

Yes

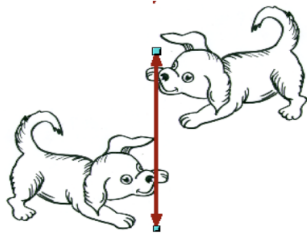

No

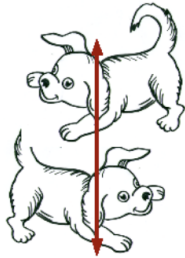

---

Note: Drawing from <http://erwinnavyanto.in/cartoon-dog-drawings-in-pencil/>
