# Supplementary material
Source: publisher figshare collection journal article supplement (https://plos.figshare.com/articles/dataset/_/4503584)
Supplement: Supplementary file 1 [file 1 › S2 File.pdf]

Table S2File 1

*Tests of Fixed Effects in Dog Puppies*

| Pause             | Effect      | Numerator <i>df</i> | Denominator <i>df</i> | <i>F</i> Value | Pr > <i>F</i> |
|-------------------|-------------|---------------------|-----------------------|----------------|---------------|
|                   | Role        | 1                   | 496                   | 0.14           | 0.7080        |
|                   | Timing      | 1                   | 496                   | 22.76          | <.0001        |
|                   | Timing*Role | 1                   | 496                   | 0.28           | 0.5956        |
| Vulnerable/Escape | Role        | 1                   | 496                   | 1.97           | 0.1613        |
|                   | Timing      | 1                   | 496                   | 16.67          | <.0001        |
|                   | Timing*Role | 1                   | 496                   | 12.92          | 0.0004        |
| Offensive         | Role        | 1                   | 496                   | 7.03           | 0.0083        |
|                   | Timing      | 1                   | 496                   | 6.89           | 0.0090        |
|                   | Timing*Role | 1                   | 496                   | 6.89           | 0.0090        |
| Miscellaneous     | Role        | 1                   | 496                   | 2.55           | 0.1112        |
|                   | Timing      | 1                   | 496                   | 6.20           | 0.0131        |

|             |             |   |     |      |        |
|-------------|-------------|---|-----|------|--------|
|             | Timing*Role | 1 | 496 | 0.08 | 0.7810 |
| Synchronous | Role        | 1 | 496 | 0.00 | 1.0000 |
|             | Timing      | 1 | 496 | 1.95 | 0.1637 |
|             | Timing*Role | 1 | 496 | 0.00 | 1.0000 |

---

Table S2File 2

*Timing\*Role Least Squares Means in Dog Puppies*

|                   | Timing | Role    | Estimate | Standard Error | <i>df</i> | <i>t</i> Value | Pr >   <i>t</i> |
|-------------------|--------|---------|----------|----------------|-----------|----------------|-----------------|
| Pause             | Before | Bower   | -0.8946  | 0.2026         | 496       | -4.41          | <.0001          |
|                   | Before | Partner | -0.9305  | 0.2040         | 496       | -4.56          | <.0001          |
|                   | After  | Bower   | -2.1138  | 0.2842         | 496       | -7.44          | <.0001          |
|                   | After  | Partner | -1.9055  | 0.2642         | 496       | -7.21          | <.0001          |
| Vulnerable/Escape | Before | Bower   | -2.4286  | 0.3261         | 496       | -7.45          | <.0001          |
|                   | Before | Partner | -1.8754  | 0.2673         | 496       | -7.02          | <.0001          |

|               |        |         |         |        |       |        |         |
|---------------|--------|---------|---------|--------|-------|--------|---------|
|               | After  | Bower   | -0.4908 | 0.1969 | 496   | -2.49  | 0.0130  |
|               | After  | Partner | -1.7521 | 0.2569 | 496   | -6.82  | <.0001  |
| Offensive     | Before | -0.8798 | 0.2167  | 496    | -4.06 | <.0001 | -0.8798 |
|               | Before | -0.8659 | 0.2155  | 496    | -4.02 | <.0001 | -0.8659 |
|               | After  | Bower   | -0.8798 | 0.2167 | 496   | -4.06  | <.0001  |
|               | After  | Partner | 0.1143  | 0.2005 | 496   | 0.57   | 0.5687  |
| Miscellaneous | Before | Bower   | -0.7904 | 0.2100 | 496   | -3.76  | 0.0002  |
|               | Before | Partner | -1.1824 | 0.2255 | 496   | -5.24  | <.0001  |
|               | After  | Bower   | -1.3633 | 0.2334 | 496   | -5.84  | <.0001  |
|               | After  | Partner | -1.6402 | 0.2516 | 496   | -6.52  | <.0001  |
| Synchronous   | Before | Bower   | -5.9938 | 1.1691 | 496   | -5.13  | <.0001  |
|               | Before | Partner | -5.9938 | 1.1691 | 496   | -5.13  | <.0001  |
|               | After  | Bower   | -4.8242 | 0.8226 | 496   | -5.86  | <.0001  |
|               | After  | Partner | -4.8242 | 0.8226 | 496   | -5.86  | <.0001  |

Table S2File 3

---

*Tests of Effect Slices for Timing\*Role Sliced By Role in Dog Puppies*

| Pause             | Role    | Numerator <i>df</i> | Denominator <i>df</i> | <i>F</i> Value | Pr > <i>F</i> |
|-------------------|---------|---------------------|-----------------------|----------------|---------------|
|                   | Bower   | 1                   | 496                   | 13.40          | 0.0003        |
|                   | Partner | 1                   | 496                   | 9.45           | 0.0022        |
| Vulnerable/Escape | Bower   | 1                   | 496                   | 28.60          | <.0001        |
|                   | Partner | 1                   | 496                   | 0.12           | 0.7258        |
| Offensive         | Bower   | 1                   | 496                   | 0.00           | 1.0000        |
|                   | Partner | 1                   | 496                   | 14.54          | 0.0002        |
| Miscellaneous     | Bower   | 1                   | 496                   | 4.20           | 0.0409        |
|                   | Partner | 1                   | 496                   | 2.25           | 0.1343        |
| Synchronous       | Bower   | 1                   | 496                   | 0.97           | 0.3243        |
|                   | Partner | 1                   | 496                   | 0.97           | 0.3243        |

---

Table S2File 4

---

---

*Tests of Effect Slices for Timing\*Role Sliced By Timing in Dog Puppies*

|                   | Timing | Numerator <i>df</i> | Denominator <i>df</i> | <i>F</i> Value | Pr > <i>F</i> |
|-------------------|--------|---------------------|-----------------------|----------------|---------------|
| Pause             | Before | 1                   | 496                   | 0.02           | 0.8934        |
|                   | After  | 1                   | 496                   | 0.31           | 0.5774        |
| Vulnerable/Escape | Before | 1                   | 496                   | 1.87           | 0.1723        |
|                   | After  | 1                   | 496                   | 17.48          | <.0001        |
| Offensive         | Before | 1                   | 496                   | 0.00           | 0.9592        |
|                   | After  | 1                   | 496                   | 14.59          | 0.0002        |
| Miscellaneous     | Before | 1                   | 496                   | 2.04           | 0.1542        |
|                   | After  | 1                   | 496                   | 0.78           | 0.3769        |
| Synchronous       | Before | 1                   | 496                   | 0.00           | 1.0000        |
|                   | After  | 1                   | 496                   | 0.00           | 1.0000        |

---

Table S2File 5

*Tests of Fixed Effects in Wolf Puppies*

---

| Pause             | Effect      | Numerator <i>df</i> | Denominator <i>df</i> | <i>F</i> Value | Pr > <i>F</i> |
|-------------------|-------------|---------------------|-----------------------|----------------|---------------|
|                   | Role        | 1                   | 232                   | 10.18          | 0.0016        |
|                   | Timing      | 1                   | 232                   | 0.20           | 0.6539        |
|                   | Timing*Role | 1                   | 232                   | 0.20           | 0.6539        |
| Vulnerable/Escape | Role        | 1                   | 232                   | 3.24           | 0.0733        |
|                   | Timing      | 1                   | 232                   | 6.86           | 0.0094        |
|                   | Timing*Role | 1                   | 232                   | 1.67           | 0.1980        |
| Offensive         | Role        | 1                   | 232                   | 0.82           | 0.3658        |
|                   | Timing      | 1                   | 232                   | 0.82           | 0.3658        |
|                   | Timing*Role | 1                   | 232                   | 2.81           | 0.0953        |
| Miscellaneous     | Role        | 1                   | 232                   | 0.75           | 0.3871        |
|                   | Timing      | 1                   | 232                   | 7.38           | 0.0071        |
|                   | Timing*Role | 1                   | 232                   | 0.09           | 0.7634        |
| Synchronous       | Role        | 1                   | 232                   | 0.00           | 1.0000        |
|                   | Timing      | 1                   | 232                   | 0.00           | 1.0000        |
|                   | Timing*Role | 1                   | 232                   | 0.00           | 1.0000        |

Table S2File 6

*Timing\*Role Least Squares Means in Wolf Puppies*

|                   | Timing | Role    | Estimate | Standard Error | <i>df</i> | <i>t</i> Value | Pr >   <i>t</i> |
|-------------------|--------|---------|----------|----------------|-----------|----------------|-----------------|
| Pause             | Before | Bower   | -1.3194  | 0.3452         | 232       | -3.82          | 0.0002          |
|                   | Before | Partner | -0.2635  | 0.2987         | 232       | -0.88          | 0.3786          |
|                   | After  | Bower   | -1.3194  | 0.3452         | 232       | -3.82          | 0.0002          |
|                   | After  | Partner | -0.5126  | 0.3026         | 232       | -1.69          | 0.0916          |
| Vulnerable/Escape | Before | Bower   | -2.3514  | 0.4272         | 232       | -5.50          | <.0001          |
|                   | Before | Partner | -2.5494  | 0.4644         | 232       | -5.49          | <.0001          |
|                   | After  | Bower   | -0.8267  | 0.2616         | 232       | -3.16          | 0.0018          |
|                   | After  | Partner | -2.0314  | 0.3760         | 232       | -5.40          | <.0001          |
| Offensive         | Before | Bower   | -0.7973  | 0.2839         | 232       | -2.81          | 0.0054          |
|                   | Before | Partner | -1.5126  | 0.3307         | 232       | -4.57          | <.0001          |

|               |        |         |         |        |     |       |        |
|---------------|--------|---------|---------|--------|-----|-------|--------|
|               | After  | Bower   | -1.0104 | 0.2945 | 232 | -3.43 | 0.0007 |
|               | After  | Partner | -0.7973 | 0.2839 | 232 | -2.81 | 0.0054 |
| Miscellaneous | Before | Bower   | -0.5504 | 0.2762 | 232 | -1.99 | 0.0475 |
|               | Before | Partner | -0.8966 | 0.2945 | 232 | -3.04 | 0.0026 |
|               | After  | Bower   | -1.4223 | 0.3234 | 232 | -4.40 | <.0001 |
|               | After  | Partner | -1.5944 | 0.3493 | 232 | -4.56 | <.0001 |
| Synchronous   | Before | Bower   | -4.6394 | 1.1572 | 232 | -4.01 | <.0001 |
|               | Before | Partner | -4.6394 | 1.1572 | 232 | -4.01 | <.0001 |
|               | After  | Bower   | -4.6394 | 1.1572 | 232 | -4.01 | <.0001 |
|               | After  | Partner | -4.6394 | 1.1572 | 232 | -4.01 | <.0001 |

Table S2File 7

*Tests of Effect Slices for Timing\*Role Sliced By Role in Wolf Puppies*

| Pause | Role  | Numerator <i>df</i> | Denominator <i>df</i> | <i>F</i> Value | Pr > <i>F</i> |
|-------|-------|---------------------|-----------------------|----------------|---------------|
|       | Bower | 1                   | 232                   | 0.00           | 1.0000        |

|                   |         |   |     |      |        |
|-------------------|---------|---|-----|------|--------|
|                   | Partner | 1 | 232 | 0.50 | 0.4816 |
| Vulnerable/Escape | Bower   | 1 | 232 | 9.26 | 0.0026 |
|                   | Partner | 1 | 232 | 0.75 | 0.3869 |
| Offensive         | Bower   | 1 | 232 | 0.32 | 0.5729 |
|                   | Partner | 1 | 232 | 3.11 | 0.0793 |
| Miscellaneous     | Bower   | 1 | 232 | 4.99 | 0.0265 |
|                   | Partner | 1 | 232 | 2.68 | 0.1028 |
| Synchronous       | Bower   | 1 | 232 | 0.00 | 1.0000 |
|                   | Partner | 1 | 232 | 0.00 | 1.0000 |

Table S2File 8

*Tests of Effect Slices for Timing\*Role Sliced By Timing in Wolf Puppies*

|       | Timing | Numerator <i>df</i> | Denominator <i>df</i> | <i>F</i> Value | Pr > <i>F</i> |
|-------|--------|---------------------|-----------------------|----------------|---------------|
| Pause | Before | 1                   | 232                   | 6.92           | 0.0091        |
|       | After  | 1                   | 232                   | 3.98           | 0.0471        |

|                   |        |   |     |      |        |
|-------------------|--------|---|-----|------|--------|
| Vulnerable/Escape | Before | 1 | 232 | 0.10 | 0.7539 |
|                   | After  | 1 | 232 | 6.92 | 0.0091 |
| Offensive         | Before | 1 | 232 | 3.11 | 0.0793 |
|                   | After  | 1 | 232 | 0.32 | 0.5729 |
| Miscellaneous     | Before | 1 | 232 | 0.85 | 0.3575 |
|                   | After  | 1 | 232 | 0.14 | 0.7042 |
| Synchronous       | Before | 1 | 232 | 0.00 | 1.0000 |
|                   | After  | 1 | 232 | 0.00 | 1.0000 |

---
